# Supplementary material
Source: Springer Nature journal article supplement (https://www.springermedizin.de/resource/supplementary/12943_2009_516_MOESM12_ESM.pdf/9554404)

**NPC**

**Matched normal**

**A**

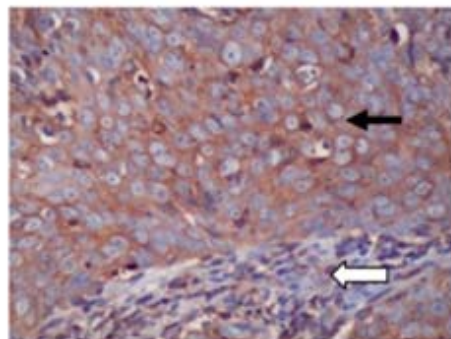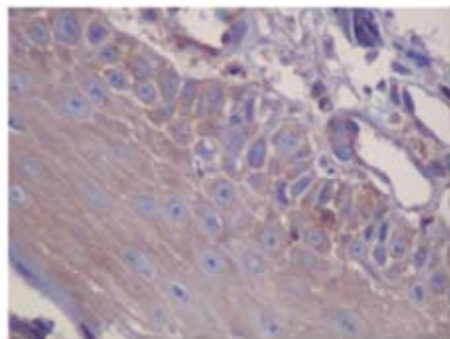

**X 400**

**B**

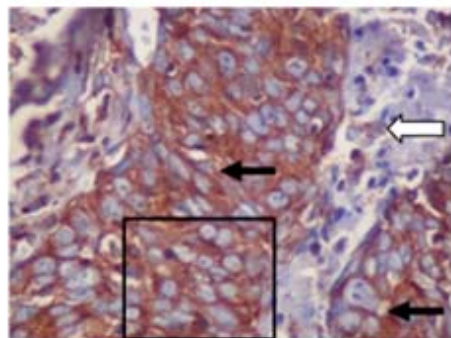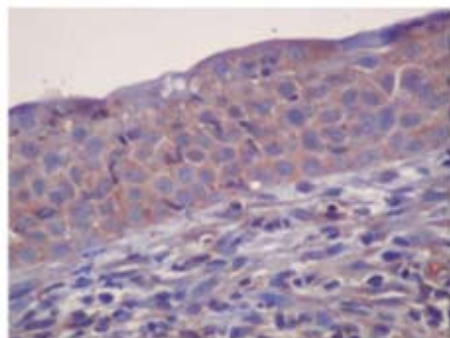

**X 400**

**C**

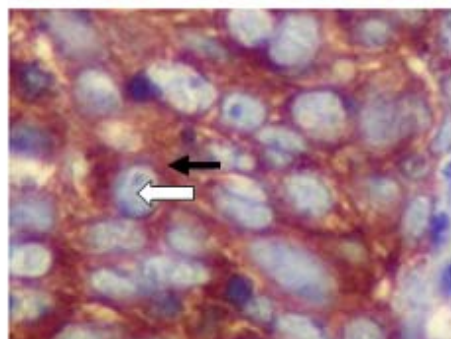

Supplement: MOESM12 [file 9554404]
